# Supplementary material for: Estimating the volume of Alpine glacial lakes
Source: Copernicus journal article supplement (doi:10.5194/esurf-3-559-2015), 2015-12-14
Supplement: Supplementary file 1 [file esurf-3-559-2015-supplement.zip]

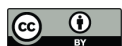

## *Supplement of*

## **Estimating the volume of Alpine glacial lakes**

**S. J. Cook and D. J. Quincey**

*Correspondence to:* S. J. Cook ([s.j.cook@mmu.ac.uk](mailto:s.j.cook@mmu.ac.uk)) and D. J. Quincey ([d.j.quincey@leeds.ac.uk](mailto:d.j.quincey@leeds.ac.uk))

- [esurf-3-559-2015-supplement-title-page.pdf](#)
- [Supplementary Table 1.docx](#)
- [Supplementary Table 2.docx](#)

The copyright of individual parts of the supplement might differ from the CC-BY 3.0 licence.
